# Supplementary material for: Asian Flush Phenotype Associated with Protective Properties Against COVID-19: Web-based Retrospective Study
Source: Research Square preprint supplement (doi:10.21203/rs.3.rs-7220391/v1), 2025-11-24
Supplement: Supplementary file 1 [file 967a7b325967d81fc9d3d504.docx]

**Figure S1. Cumulative number of COVID-19 cases or deaths per 100,000 individuals.**

Data were obtained from the World Health Organization database (<https://covid19.who.int/WHO-COVID-19-global-data.csv>). The numbers represent occurrences per population of cases (left panels) or deaths (right panels), respectively.

| Table S1. Questionnaire. | | |
| --- | --- | --- |
| Questions | | Answers |
| Are you the person in question? | | It is the person in question.  (Only option to proceed) |
| Biological sex | | 1. Male 2. Female 3. Other |
| Race | | 1. East Asians, such as Japanese, Korean, Chinese, and Taiwanese 2. Southeast Asian 3. Other |
| Prefecture of residence | | 1. Select from 47 prefectures and overseas |
| Occupation | | 1. Jobs that involve serving customers for relatively long periods, such as waitstaff in restaurants and other interpersonal services, and outside salespeople who interact with people 2. Medical and care workers 3. Office workers, excluding government employees, such as indoor sales and distributors. 4. School staff and students 5. Government officials (excluding school staff) 6. Local officials (excluding school staff) 7. Housework 8. Other |
| Age: As of August 1, 2024 | | In Google Forms:   1. 20-29 years old 2. 30-39 years old 3. 40-49 years old 4. 50-59 years old 5. 60-69 years old 6. 70-79 years old 7. 80-89 years old 8. 90-99 years old 9. Over 100 years old   In Rakuten Insight:  Please enter your age (≥ 20 years) |
| BMI = body weight (kg) ÷ height (m)2  Please enter your BMI from your health checkup or calculate it at the website below. A quick reference table is also available. You can also enter your height and weight.  <https://www.e-healthnet.mhlw.go.jp/information/metabolic/bmi_check.html> | |  |
| Drinking habits: Answer about your status after 2019. Please select the frequency of drinking alcoholic beverages. | | 1. Every day 2. At least 4 times a week 3. 2–3 times a week 4. 2–4 times a month 5. Once a month 6. Don’t drink |
| Amount of alcohol consumed (net alcohol):  Please answer the average amount of pure alcohol per drink by referring to the table. A quick reference table is also available.  For example, if you do not drink, enter "0".  For 1 regular can (350 mL) of beer (14 g) and 1 regular can (350 mL) of whisky and soda (20 g). |  | |
| Sensitivity to alcohol:  Recall the physical reaction around the time of the first drink.  Note: Continued alcohol use may cause mild flushing as you age. Weakening of the flushing response may also occur as a result of continued drinking habits. | 1. Tolerance (no flushing after drinking) 2. Weak (flushing after drinking) 3. Intolerance (flushing after drinking a little) | |
| Smoking habits after 2020:  Please select the type of smoking device. | 1. No smoking 2. Paper cigarettes 3. Heated cigarettes (using tobacco leaves, e.g. iQOS, PloomTech, Glo) 4. Electronic cigarettes without nicotine and tar 5. Other smoking gear | |
| Medical History  (multiple choice) | - Diabetes mellitus - Cardiac disease - Respiratory disease - Allergic disease - Collagen disease - Hepatitis - Fatty liver - Pharyngeal cancer, esophageal cancer - Othe cancer - Depression - Other - None | |
| Highest fever:  For each life stage, please report the highest fever you have ever experienced due to an infection of the nose, throat, trachea or bronchi (e.g., common cold, influenza virus infection, coronavirus infection). | Rows   1. < 30 years old 2. 30–49 years old 3. ≥ 50 years old   Columns   1. Not yet reached this age 2. 36.0–36.9℃ 3. 37.0–37.9℃ 4. 38.0–38.9℃ 5. 39.0–39.9℃ 6. 40.0–40.9℃ 7. ≥ 41°C 8. I cannot remember 9. I never had a fever 10. I never had such an infection | |
| Choose the number of COVID-19 vaccinations.  Your effort to check your vaccination record would be greatly appreciated. | 1. Not vaccinated 2. 1 dose 3. 2 doses 4. 3 doses 5. 4 doses 6. 5 doses 7. 6 doses 8. 7 doses 9. 8 doses 10. 9 doses 11. I cannot remember | |
| Have you experienced COVID-19 (including probable COVID-19) in the last 5 years? | 1. Experienced 2. No experience 3. I cannot remember | |
| Please report when and how often you experienced COVID-19 | Rows   1. Fall 2019–Winter 2020 2. Spring–Summer 2020 3. Fall 2020–Winter 2021 4. Spring–Summer 2021 5. Fall 2021–Summer 2022 6. Fall 2022–Summer 2023 7. Fall 2023–Summer 2024   Columns   1. Not experienced 2. Once 3. Twice 4. 3 times 5. I cannot remember | |
| How were you diagnosed with COVID-19? | Rows   1. First COVID-19 2. Second COVID-19 3. Third COVID-19 4. Fourth COVID-19 5. Fifth COVID-19 6. Sixth COVID-19   Columns   1. Not experienced 2. PCR test 3. Antigen test 4. Physician diagnosis 5. Self-diagnosis based on symptoms/ unsure | |
| Please report the location where the infection may have occurred. | Rows   1. First COVID-19 2. Second COVID-19 3. Third COVID-19 4. Fourth COVID-19 5. Fifth COVID-19 6. Sixth COVID-19   Columns   1. Not experienced 2. Restaurant 3. Workplace/school/university 4. Home 5. Other 6. I cannot remember | |

Figure S2. Cumulative ratio of vaccinated individuals

The cumulative ratio of individuals vaccinated with the COVID-19 vaccine in Japan was calculated based on public data published by the Ministry of Health, Labor and Welfare (https://www.mhlw.go.jp/stf/seisakunitsuite/bunya/kenkou_iryou/kenkou/kekkaku-kansenshou/yobou-sesshu/syukeihou_00002.html) and the national population reported by the Ministry of Internal Affairs and Communications (https://www.mhlw.go.jp/content/001237496.pdf).

Table S2. Diagnostic bases for COVID-19.

|  | Google | | | | | | | |  | |
| --- | --- | --- | --- | --- | --- | --- | --- | --- | --- | --- |
|  | Total | PCR | Antigen | Doctor | Self | unknown | p-value* | | | |
|  | N (%) | N (%) | N (%) | N (%) | N (%) | N (%) |  | |  | |
| **First COVID-19** |  |  |  |  |  |  |  | |  | |
| All | 614 (100%) | 260 (42.3%) | 233 (37.9%) | 58 (9.4%) | 57 (9.3%) | 6 (1.0%) |  | |  | |
| Tolerance | 262 (100%) | 107 (40.8%) | 102 (38.9%) | 28 (10.7%) | 23 (8.8%) | 2 (0.8%) | 0.860 | |  | |
| Weak | 261 (100%) | 114 (43.7%) | 97 (37.2%) | 20 (7.7%) | 26 (10.0%) | 4 (1.5%) |  | |  | |
| Intolerance | 91 (100%) | 39 (42.9%) | 34 (37.4%) | 10 (11.0%) | 8 (8.8%) | 0 (0.0%) |  | |  | |
| **Second COVID-19** |  |  |  |  |  |  |  | |  | |
| All | 116 (100%) | 36 (31.0%) | 49 (42.2%) | 10 (8.6%) | 18 (15.5%) | 3 (2.6%) |  | |  | |
| Tolerance | 55 (100%) | 14 (25.5%) | 25 (45.5%) | 7 (12.7%) | 8 (14.5%) | 1 (1.8%) | 0.2771 | |  | |
| Weak | 38 (100%) | 17 (44.7%) | 13 (34.2%) | 2 (5.3%) | 6 (15.8%) | 0 (0.0%) |  | |  | |
| Intolerance | 23 (100%) | 5 (21.7%) | 11 (47.8%) | 1 (4.3%) | 4 (17.4%) | 2 (8.7%) |  | |  | |
| **Third COVID-19** |  |  |  |  |  |  |  | |  | |
| All | 11 (100%) | 5 (45.5%) | 2 (18.2%) | 0 (0.0%) | 1 (9.1%) | 3 (27.3%) |  | |  | |
| Tolerance | 7 (100%) | 2 (28.6%) | 1 (14.3%) | 0 (0.0%) | 1 (14.3%) | 3 (42.9%) | 0.7273 | |  | |
| Weak | 2 (100%) | 1 (50.0%) | 1 (50.0%) | 0 (0.0%) | 0 (0.0%) | 0 (0.0%) |  | |  | |
| Intolerance | 2 (100%) | 2 (100.0%) | 0 (0.0%) | 0 (0.0%) | 0 (0.0%) | 0 (0.0%) |  | |  | |
| **Fourth and later COVID-19** |  |  |  |  |  |  |  | |  | |
| All | 1 (100%) | 0 (0.0%) | 0 (0.0%) | 0 (0.0%) | 1 (100%) | 0 (0.0%) |  | |  | |
| Tolerance | 1 (100%) | 0 (0.0%) | 0 (0.0%) | 0 (0.0%) | 1 (100%) | 0 (0.0%) |  |  | | |
| Weak | 0 (100%) | 0 (0.0%) | 0 (0.0%) | 0 (0.0%) | 0 (0.0%) | 0 (0.0%) |  |  | | |
| Intolerance | 0 (100%) | 0 (0.0%) | 0 (0.0%) | 0 (0.0%) | 0 (0.0%) | 0 (0.0%) |  |  | | |
|  | **Rakuten** | | | | | | | |  | |
|  | Total | PCR | Antigen | Doctor | Self | unknown | p-value* | | | |
|  | N (%) | N (%) | N (%) | N (%) | N (%) | N (%) |  | |  | |
| **First COVID-19** |  |  |  |  |  |  |  | |  | |
| All | 2389 (100%) | 1222 (51.2%) | 497 (20.8%) | 303 (12.7%) | 300 (12.6%) | 67 (2.8%) |  | |  | |
| Tolerance | 842 (100%) | 423 (50.2%) | 167 (19.8%) | 113 (13.4%) | 119 (14.1%) | 20 (2.4%) | 0.389 | |  | |
| Weak | 1034 (100%) | 538 (52.0%) | 219 (21.2%) | 119 (11.5%) | 129 (12.5%) | 29 (2.8%) |  | |  | |
| Intolerance | 513 (100%) | 261 (50.9%) | 111 (21.6%) | 71 (13.8%) | 52 (10.1%) | 18 (3.5%) |  | |  | |
| **Second COVID-19** |  |  |  |  |  |  |  | |  | |
| All | 418 (100%) | 177 (42.3%) | 90 (21.5%) | 52 (12.4%) | 89 (21.3%) | 10 (2.4%) |  | |  | |
| Tolerance | 141 (100%) | 62 (44.0%) | 32 (22.7%) | 13 (9.2%) | 30 (21.3%) | 4 (2.8%) | 0.547 | |  | |
| Weak | 185 (100%) | 74 (40.0%) | 37 (20.0%) | 25 (13.5%) | 46 (24.9%) | 3 (1.6%) |  | |  | |
| Intolerance | 92 (100%) | 41 (44.6%) | 21 (22.8%) | 14 (15.2%) | 13 (14.1%) | 3 (3.3%) |  | |  | |
| **Third COVID-19** |  |  |  |  |  |  |  | |  | |
| All | 66 (100%) | 13 (19.7%) | 8 (12.1%) | 6 (9.1%) | 11 (16.7%) | 28 (42.4%) |  | |  | |
| Tolerance | 22 (100%) | 4 (18.2%) | 2 (9.1%) | 3 (13.6%) | 5 (22.7%) | 8 (36.4%) | 0.969 | |  | |
| Weak | 30 (100%) | 7 (23.3%) | 4 (13.3%) | 2 (6.7%) | 4 (13.3%) | 13 (43.3%) |  | |  | |
| Intolerance | 14 (100%) | 2 (14.3%) | 2 (14.3%) | 1 (7.1%) | 2 (14.3%) | 7 (50.0%) |  | |  | |
| **Fourth and later COVID-19** |  |  |  |  |  |  |  | |  | |
| All | 297 (100%) | 29 (9.8%) | 34 (11.4%) | 32 (10.8%) | 49 (16.5%) | 153 (51.5%) |  | |  | |
| Tolerance | 99 (100%) | 9 (9.1%) | 18 (18.2%) | 7 (7.1%) | 9 (9.1%) | 56 (56.6%) | < 0.001 | | |  |
| Weak | 135 (100%) | 15 (11.1%) | 16 (11.9%) | 22 (16.3%) | 19 (14.1%) | 63 (46.7%) |
| Intolerance | 63 (100%) | 5 (7.9%) | 0 (0.0%) | 3 (4.8%) | 21 (33.3%) | 34 (54.0%) |

Fisher's exact test or Chi-square test*

Figure S3. Hazard ratio for the first COVID-19 by smoking status

Point estimates and 95% confidence intervals were calculated using Cox proportional hazards models for the observation period ending on August 31, 2021. The models included the following variables: sex; age (three categories); residence area (two categories); occupation (eight categories); disease history (hepatitis, fatty liver, and allergic disease); and obesity (three categories). The interactive effect between smoking status and the Asian flush phenotype was examined by an additional interactive term included in the model.
